# Supplementary figures and images for: The ATM-E6AP-MASTL axis mediates DNA damage checkpoint recovery
Source: eLife journal article supplement (doi:10.7554/elife.86976), 2023-04-25

Figure 5 supplemental 1 source data

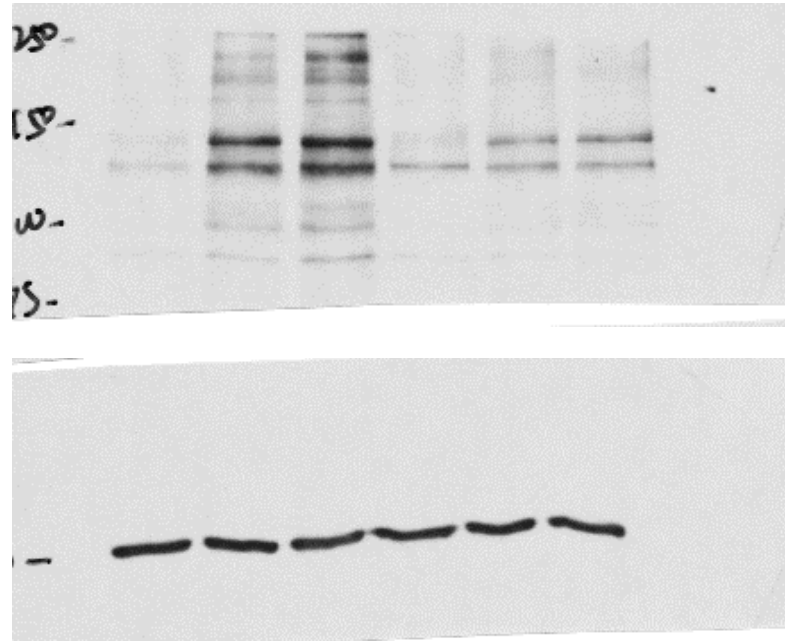

Supplement: data1 [file elife-86976-data1-v1.zip]

Figure 6 source data

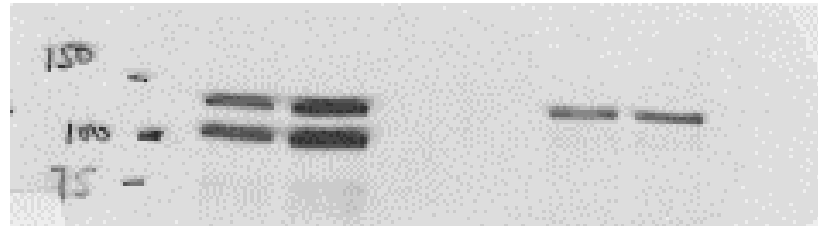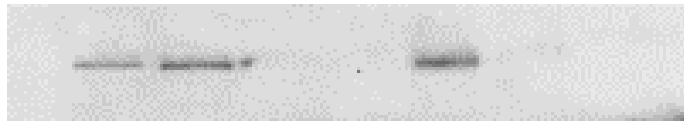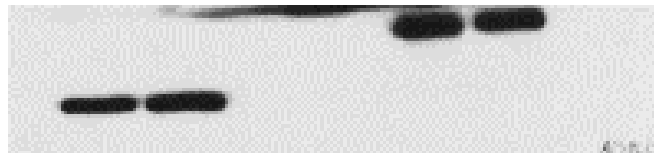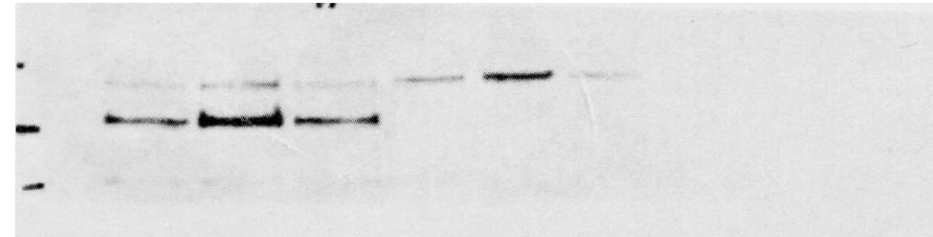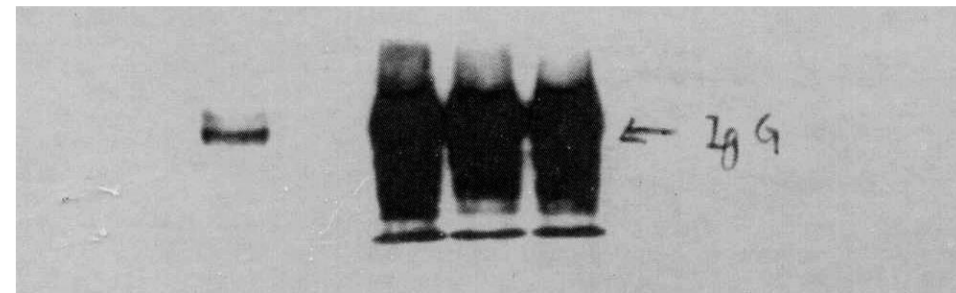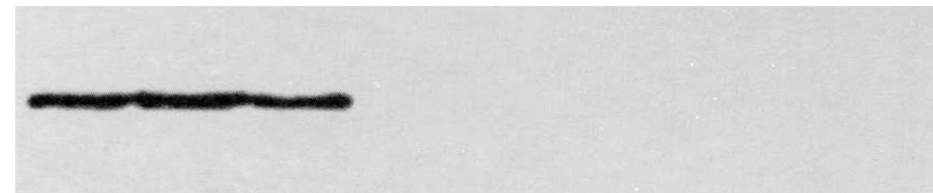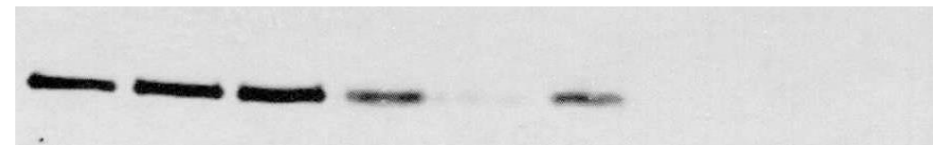

Supplement: data1 [file elife-86976-data1-v1.zip]

Figure 1 supplemental 2 source data

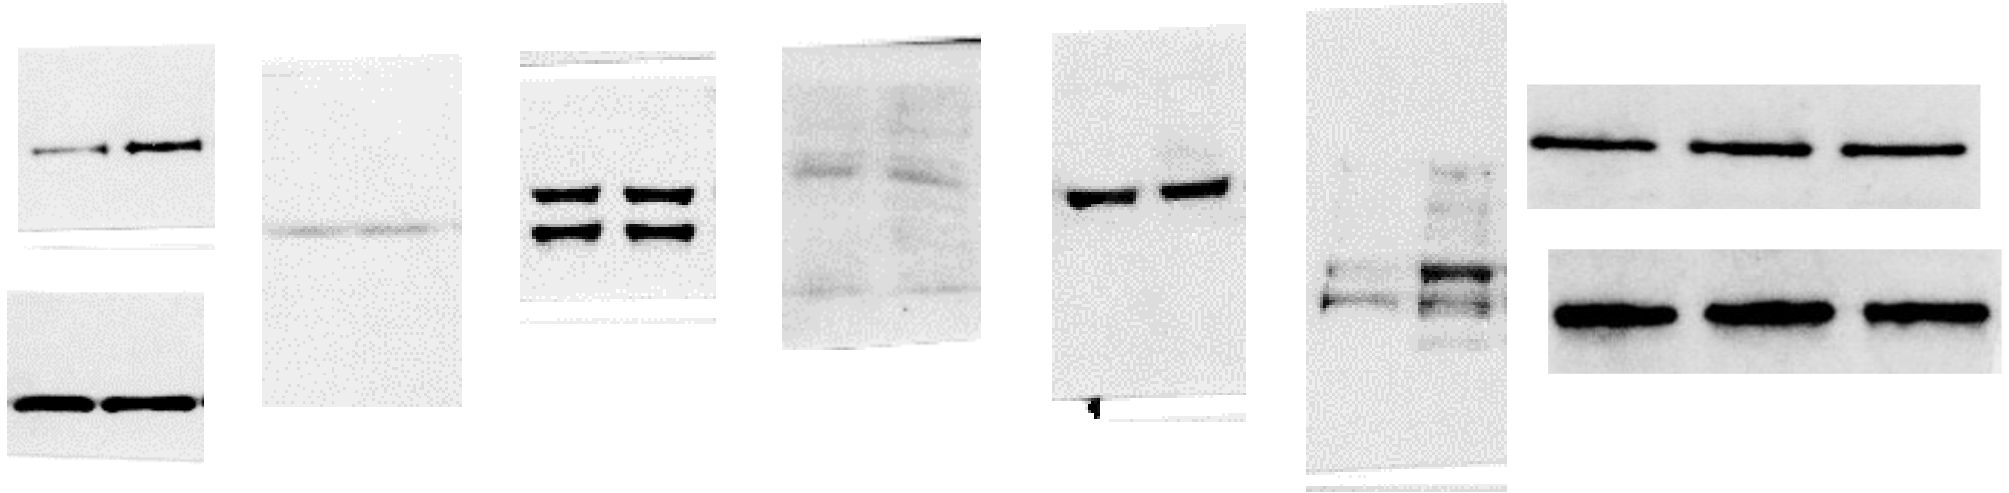

Supplement: data1 [file elife-86976-data1-v1.zip]

Figure 4 supplemental 1 source data

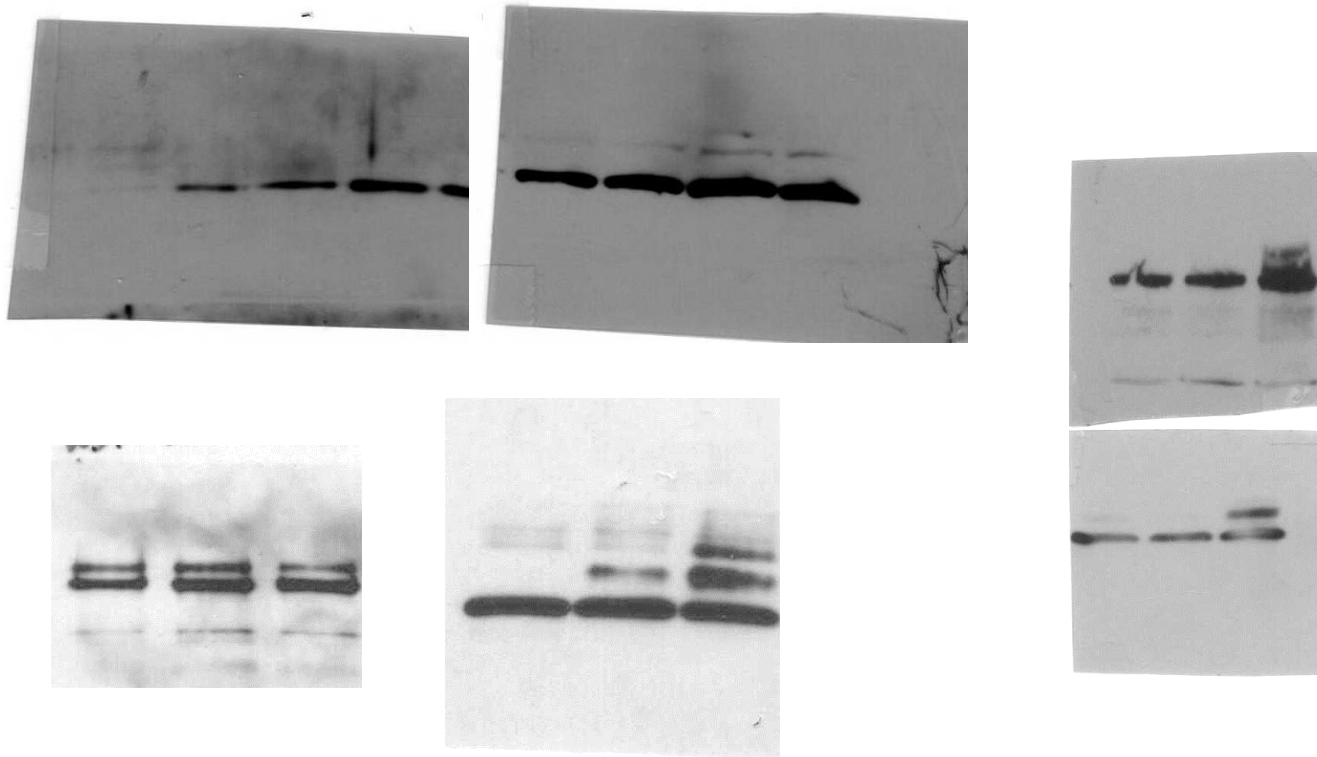

Supplement: data1 [file elife-86976-data1-v1.zip]

Figure 3 source data

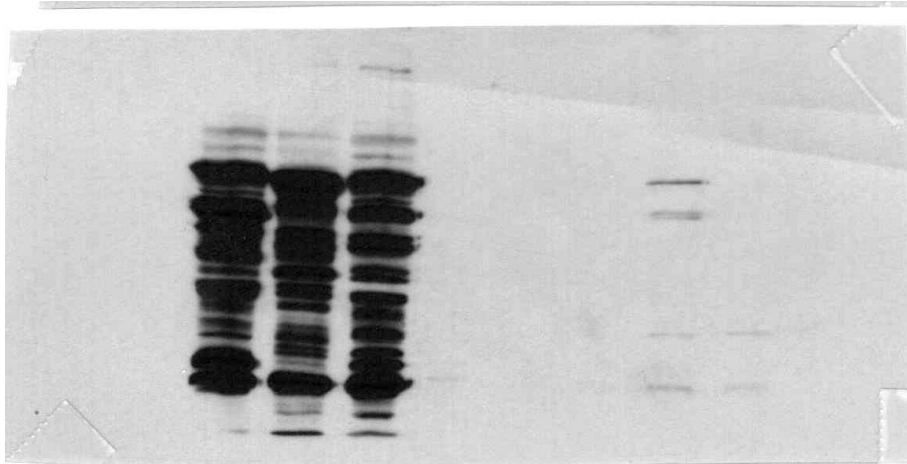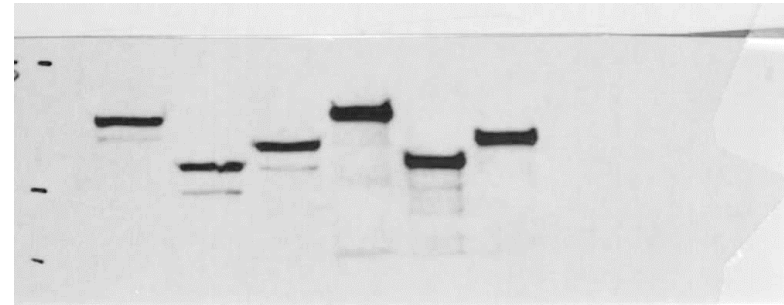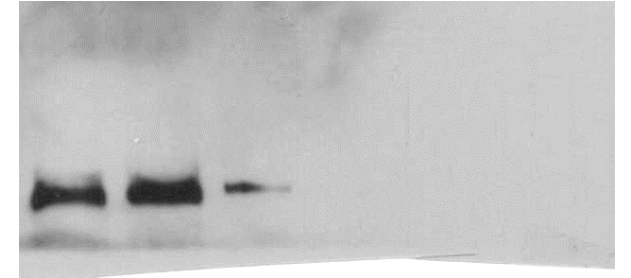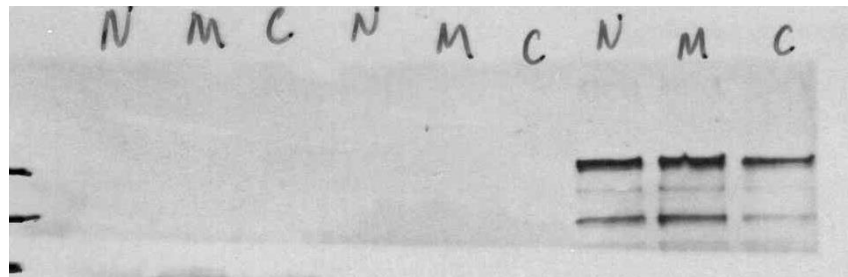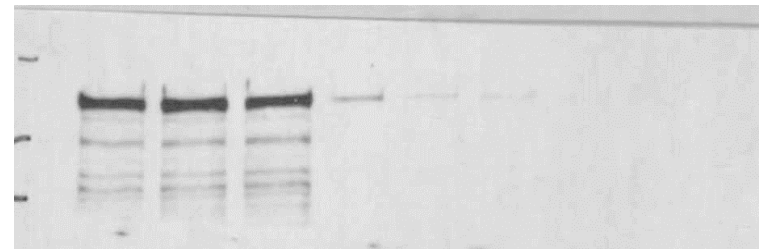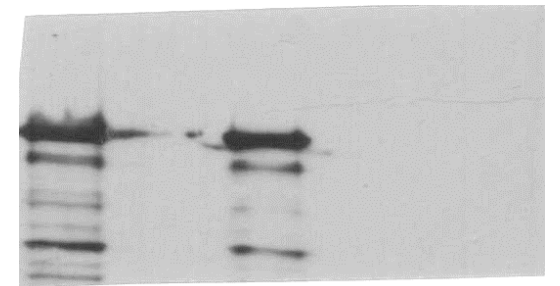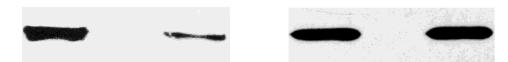

Supplement: data1 [file elife-86976-data1-v1.zip]

Figure 7 source data

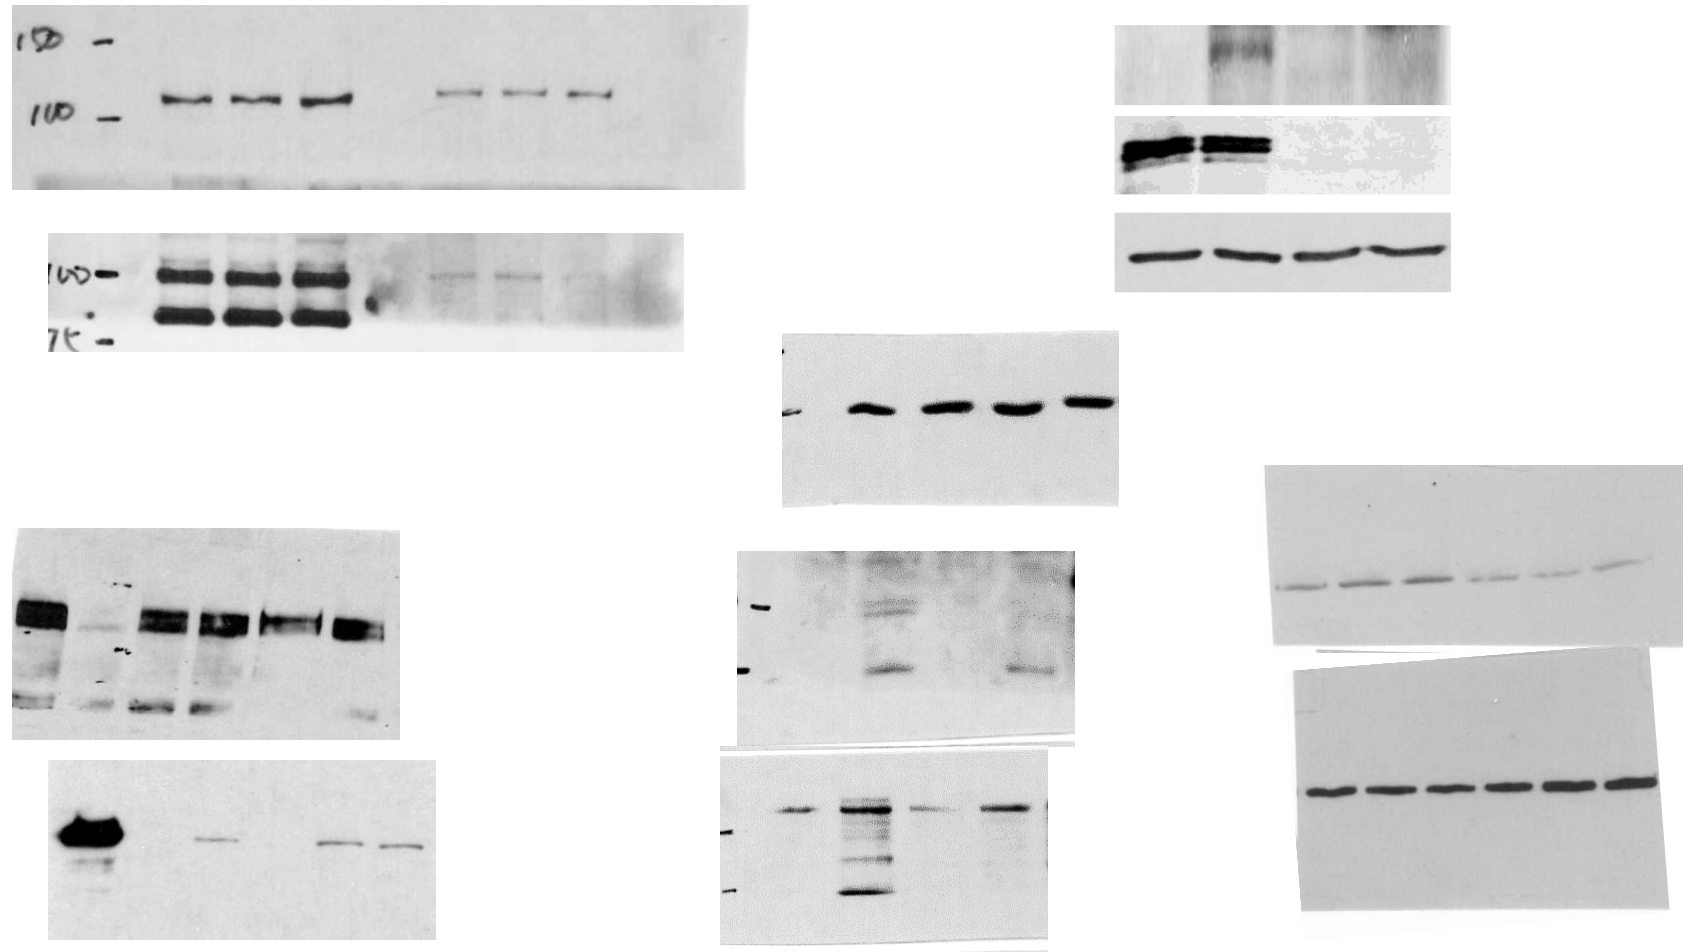

Supplement: data1 [file elife-86976-data1-v1.zip]

Figure 7 supplemental 1 source data

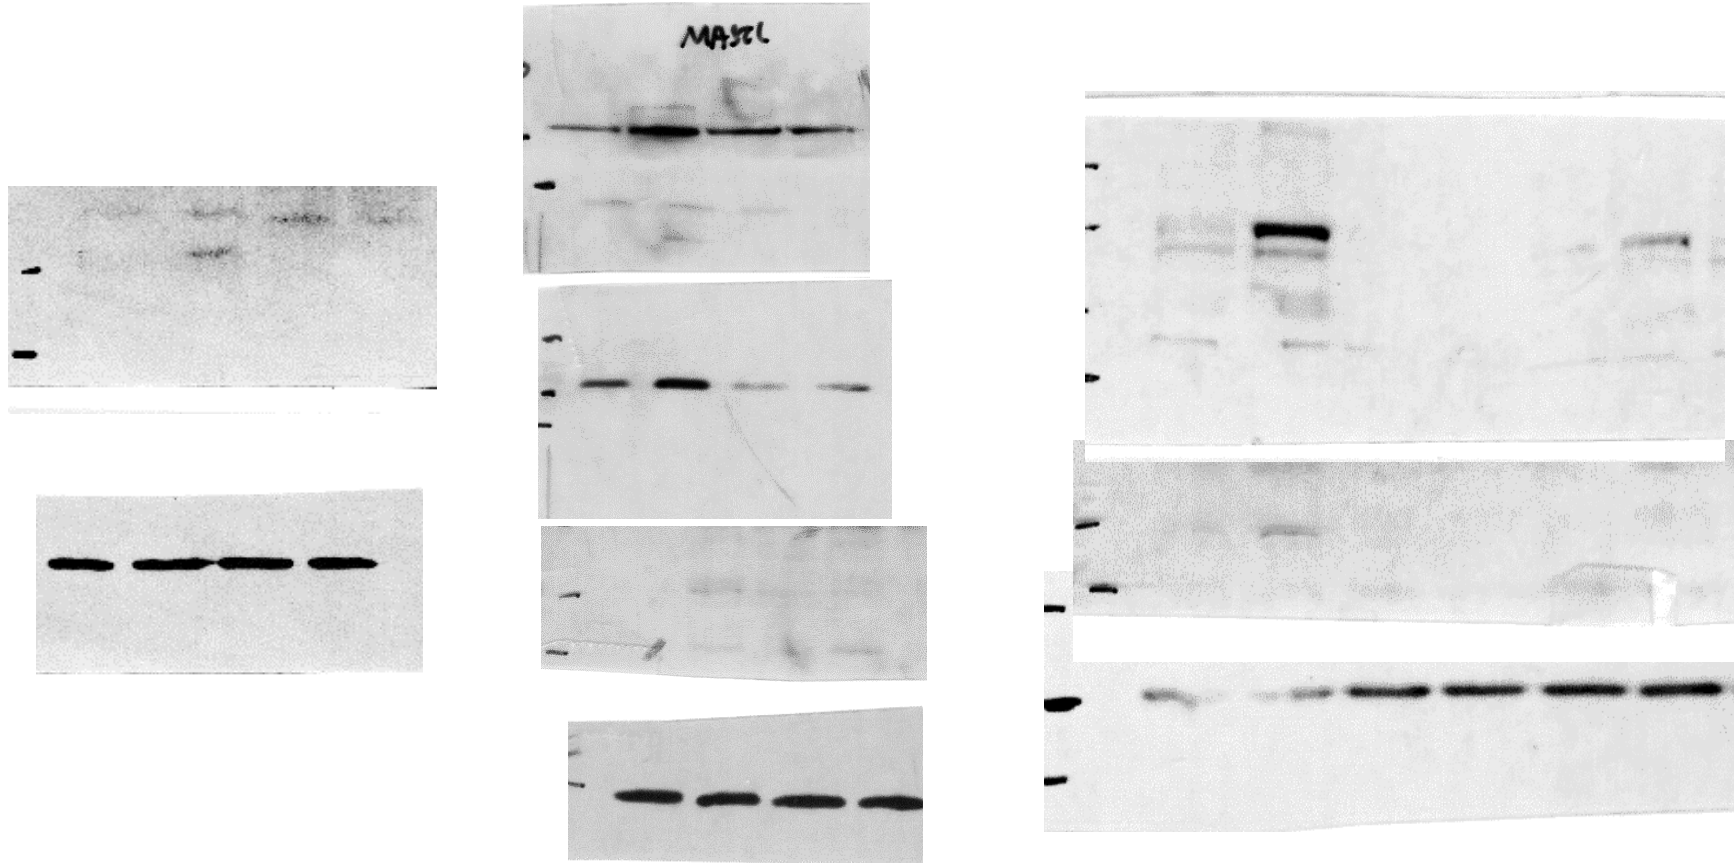

Supplement: data1 [file elife-86976-data1-v1.zip]

Figure 2 source data

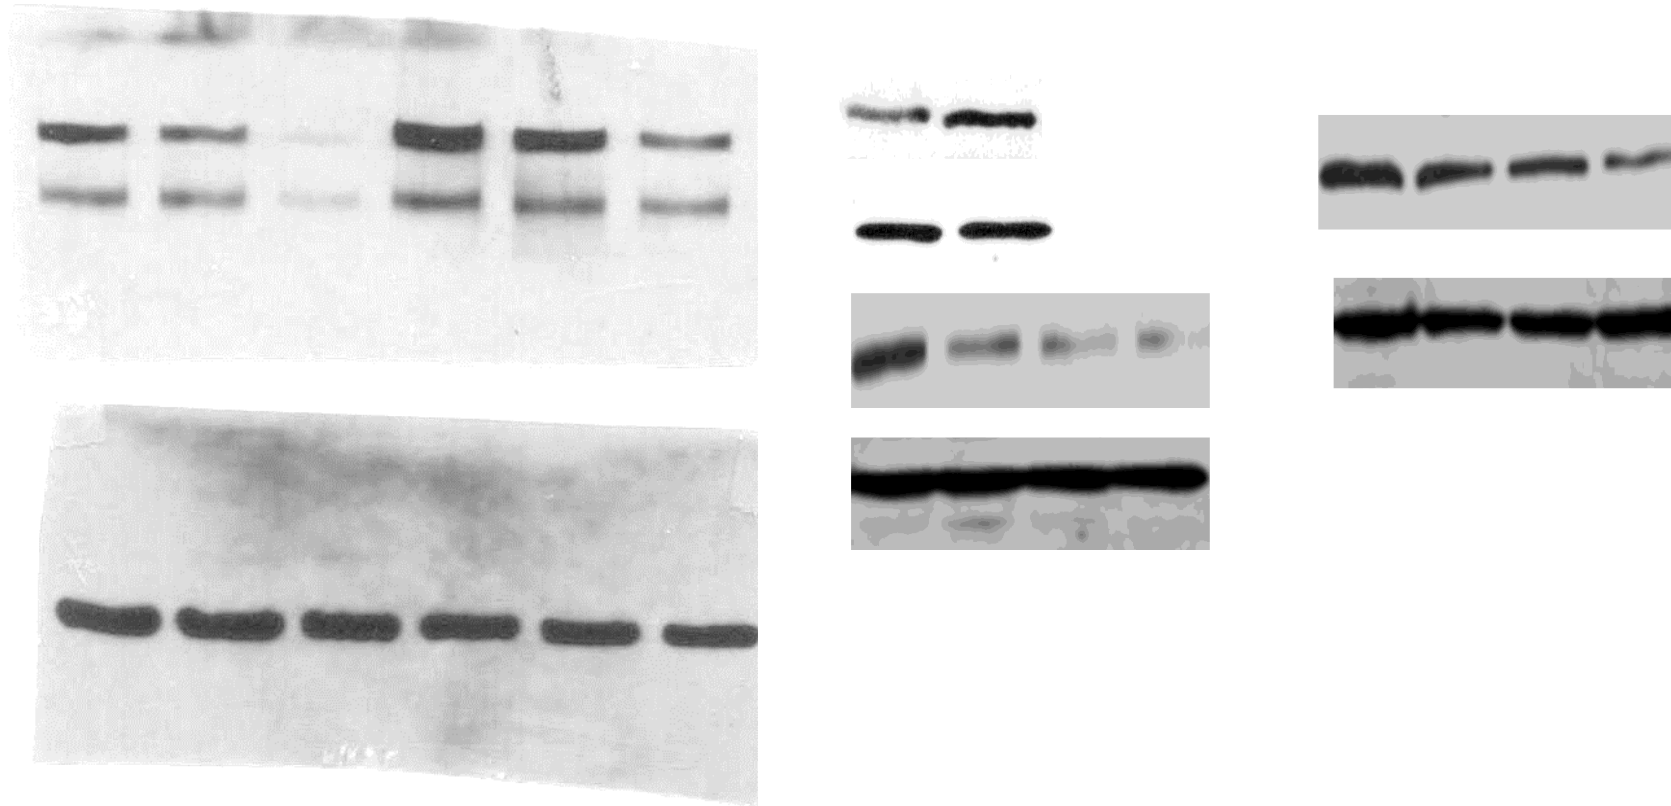

Supplement: data1 [file elife-86976-data1-v1.zip]

Figure 5 source data

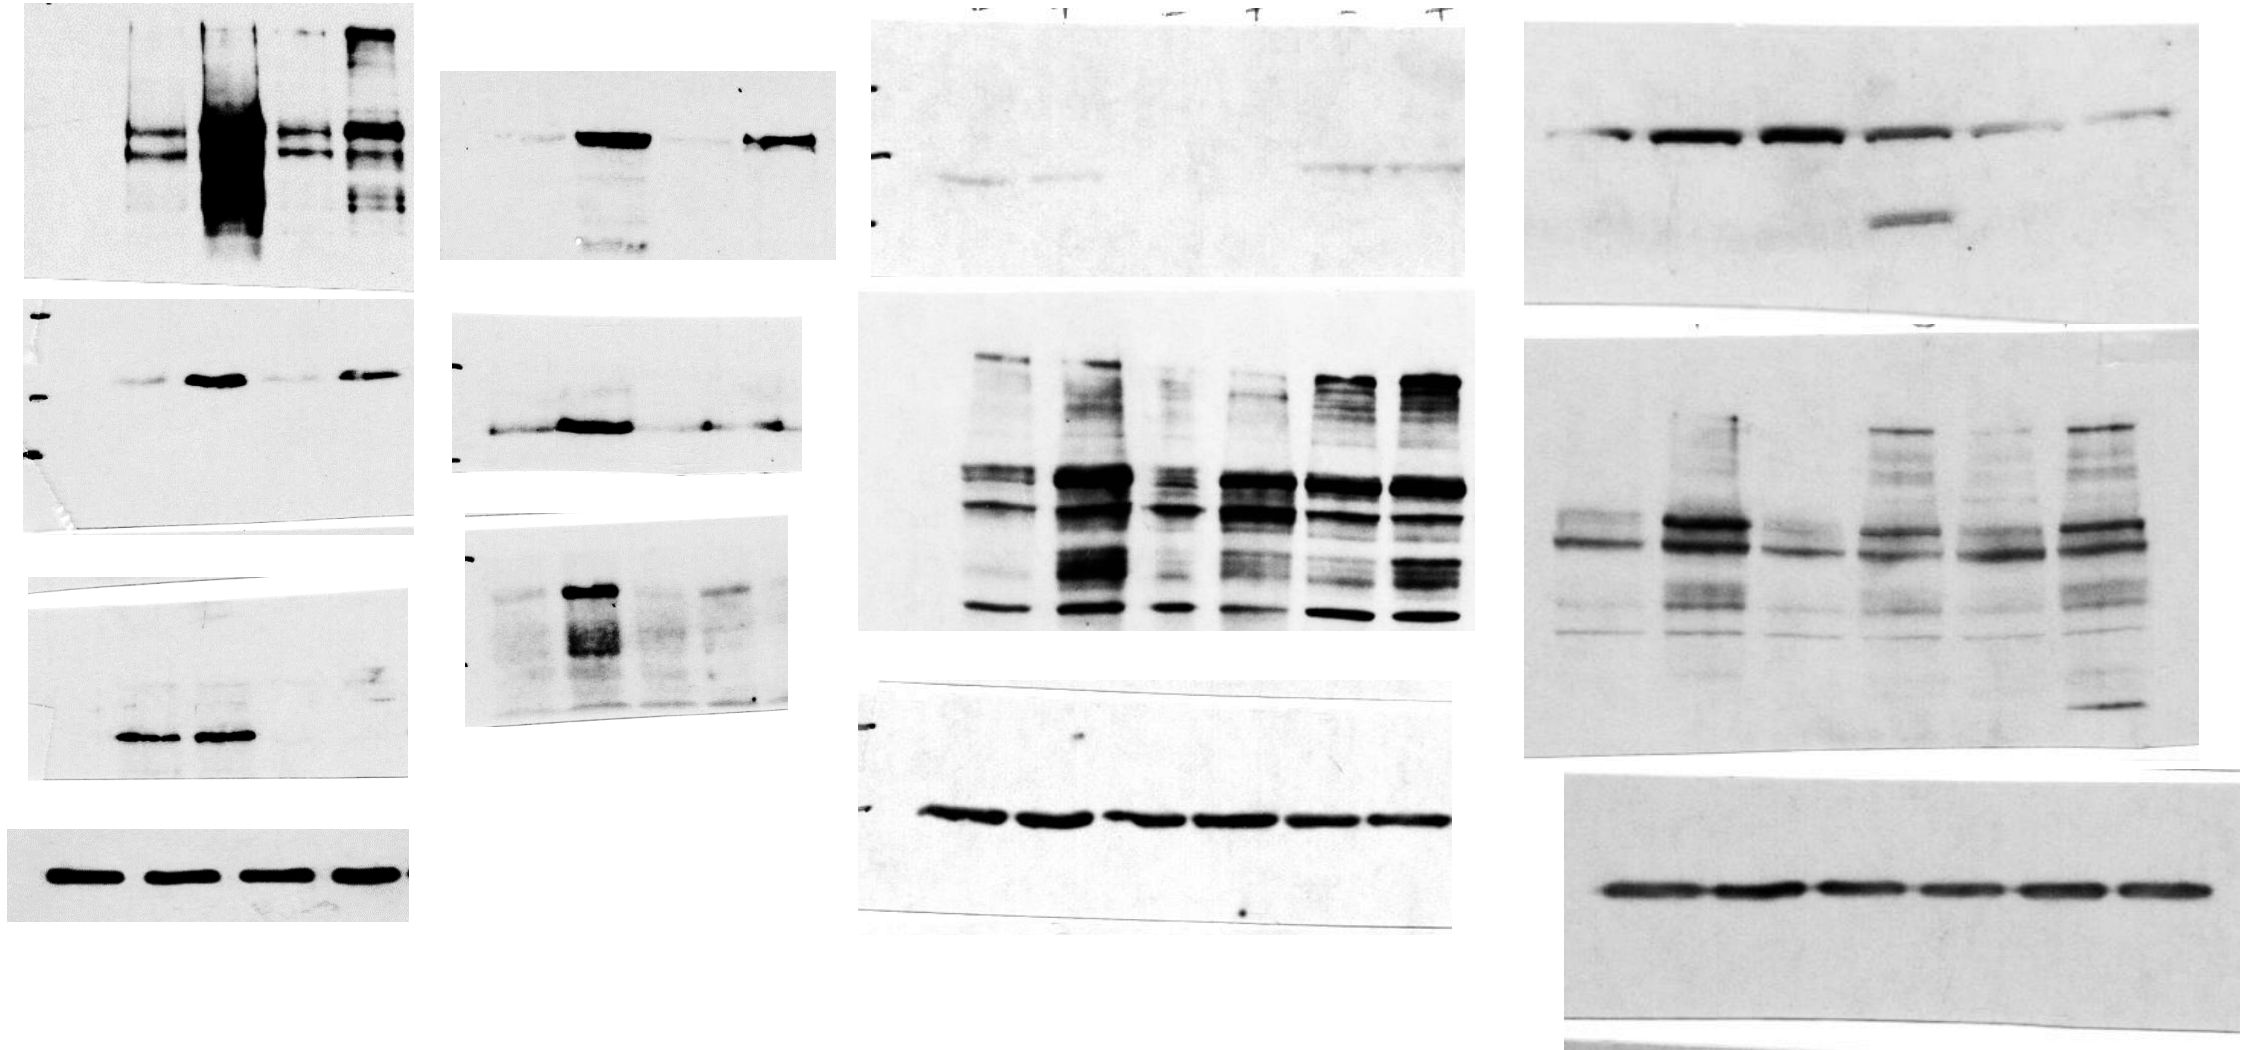

Supplement: data1 [file elife-86976-data1-v1.zip]

Figure 3 Supplemental 1 source data

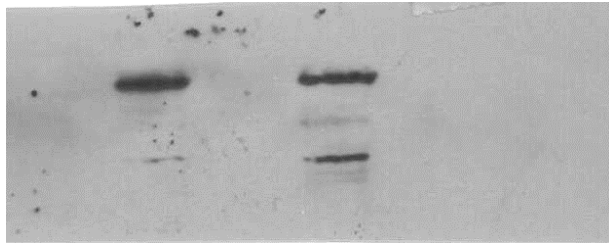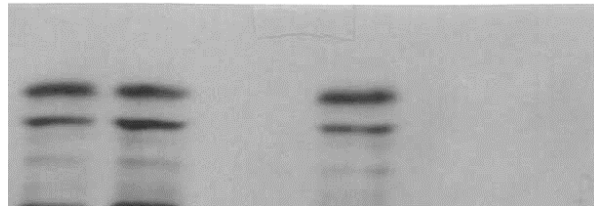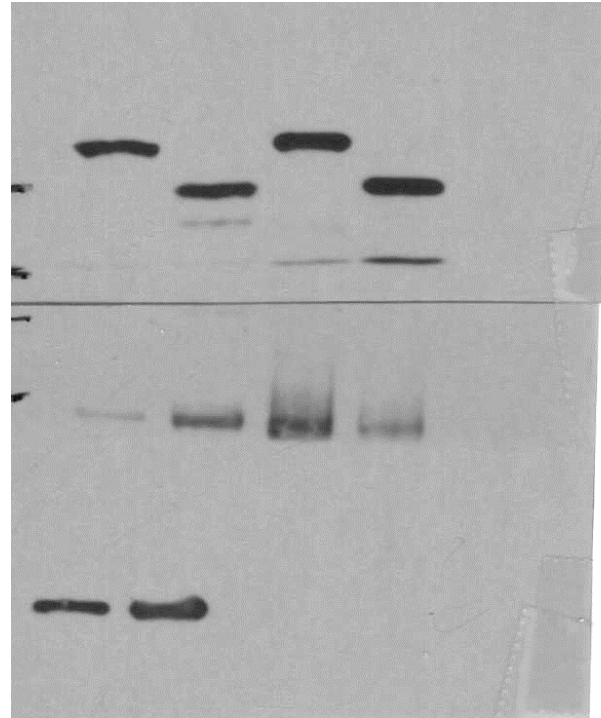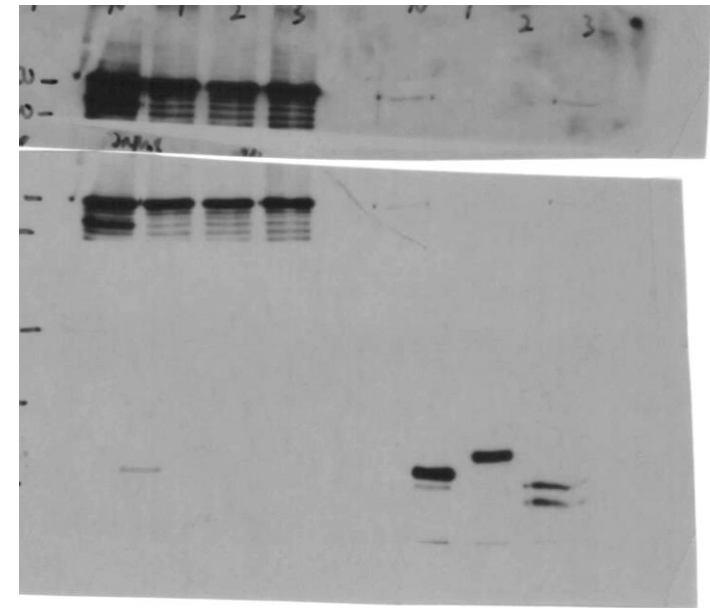

Supplement: data1 [file elife-86976-data1-v1.zip]

Figure 1 supplemental 1 source data

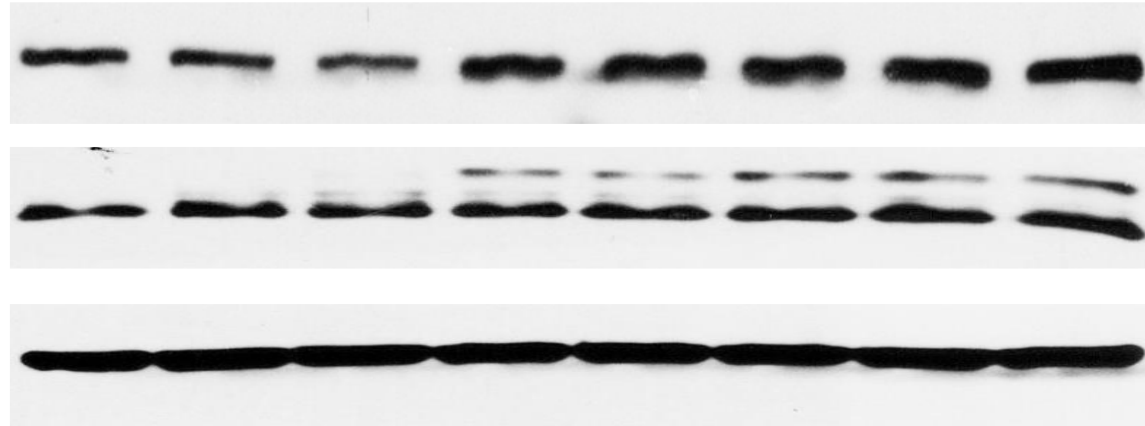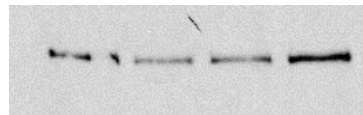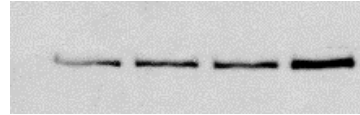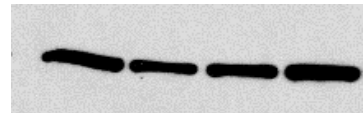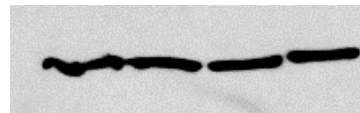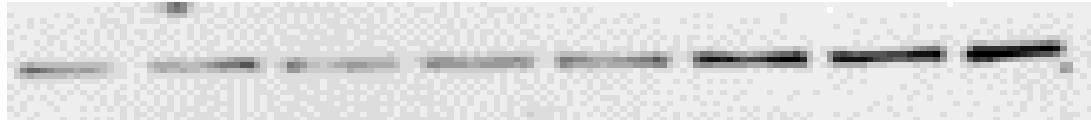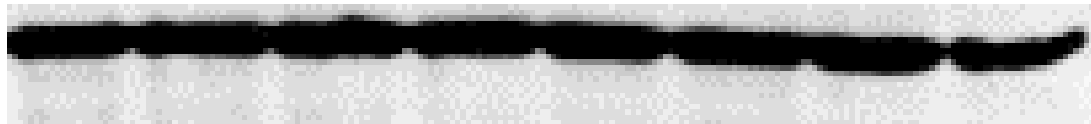

Supplement: data1 [file elife-86976-data1-v1.zip]

Figure 4 source data

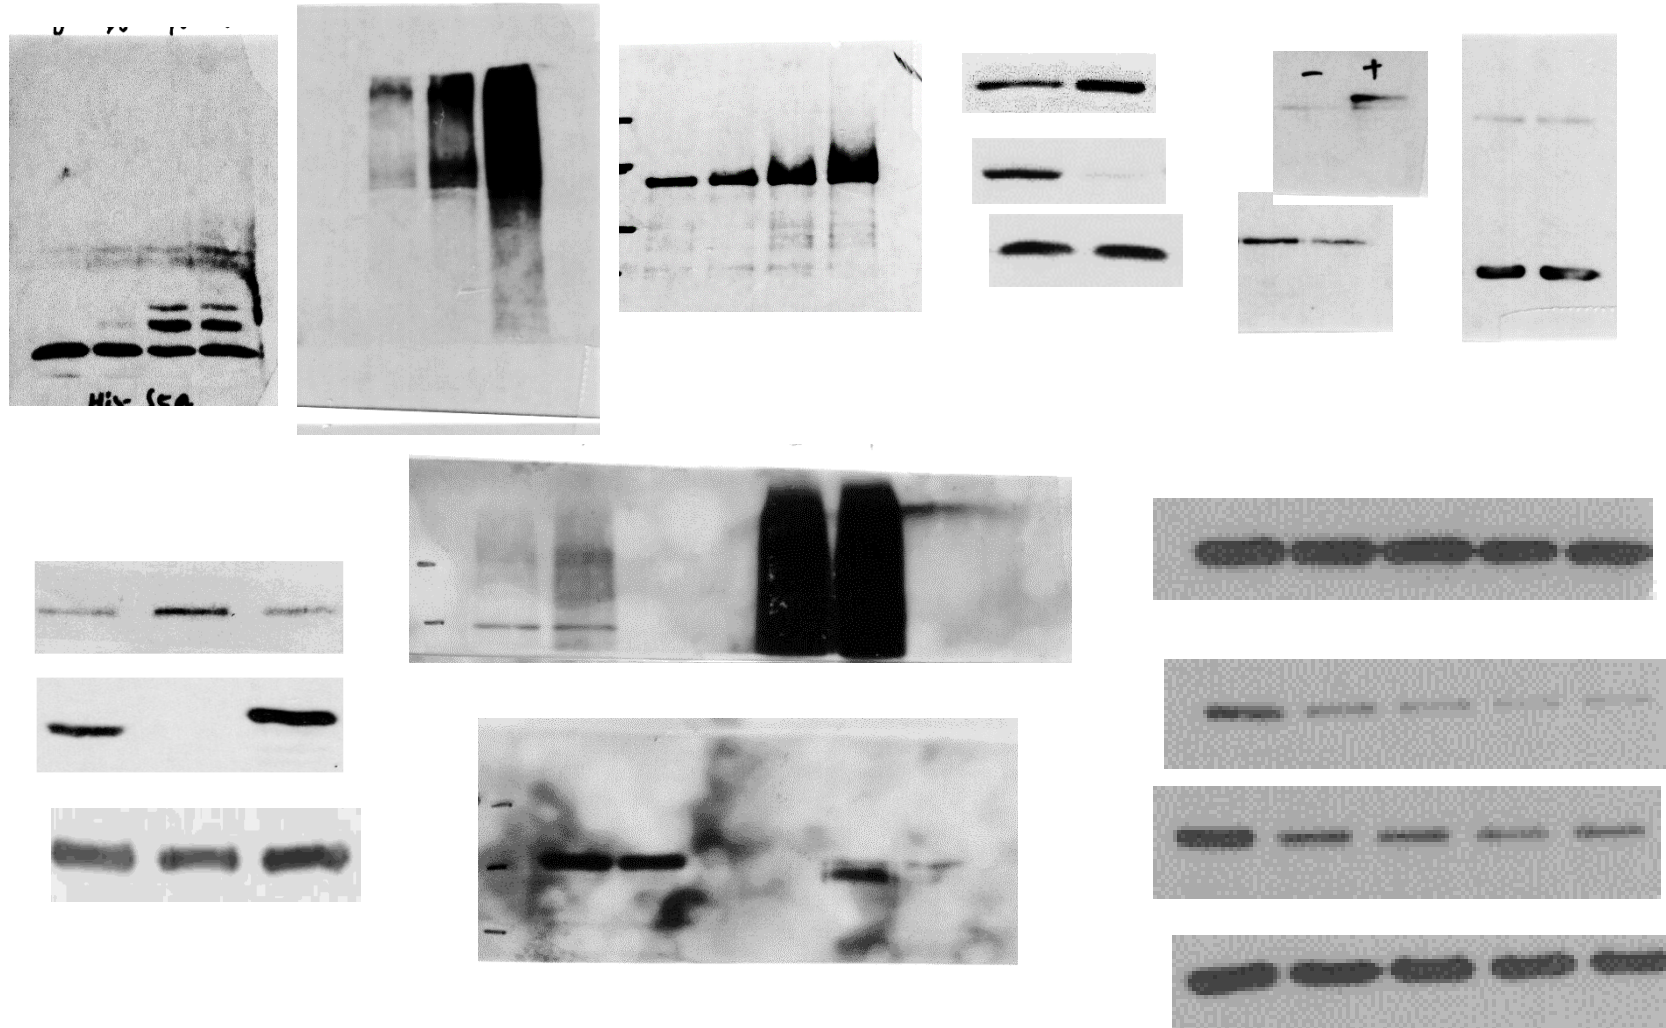

Supplement: data1 [file elife-86976-data1-v1.zip]

Figure 2 Supplemental 1 source data

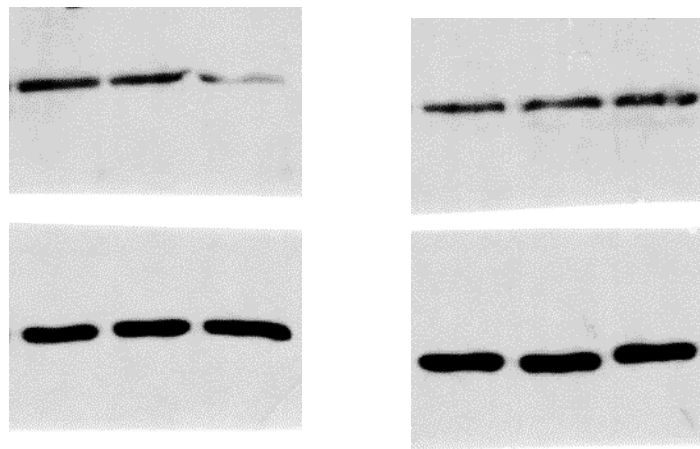

Supplement: data1 [file elife-86976-data1-v1.zip]

Figure 8 source data

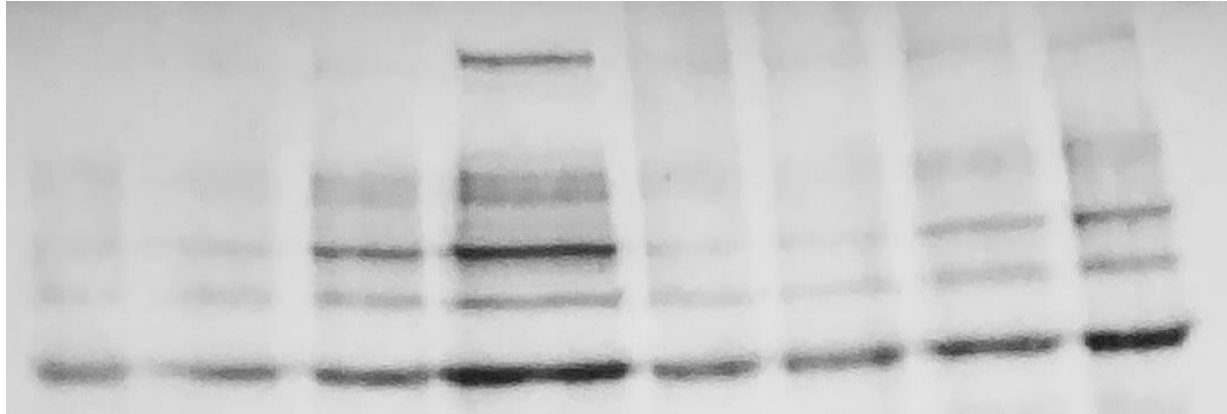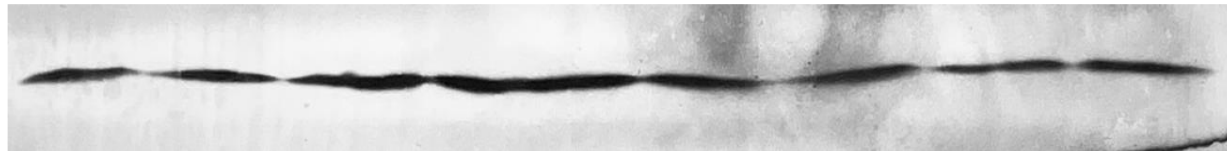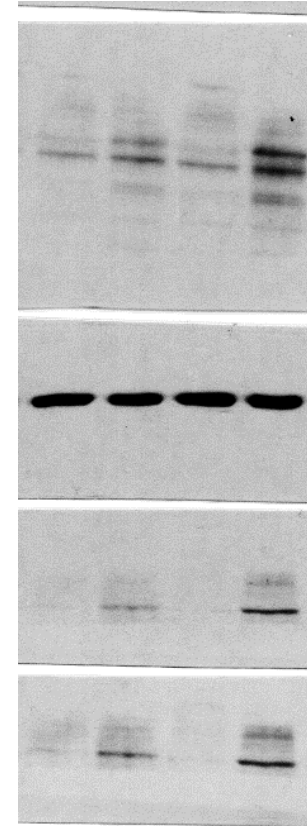

Supplement: data1 [file elife-86976-data1-v1.zip]
